# Supplementary material for: Prevalence and determinants of hypertension control among almost 100 000 treated adults in the UK
Source: HighWire-hosted journal article supplement (doi:10.1136/openhrt-2020-001461), 2021-02-01
Supplement: openhrt-2020-001461supp001_data_supplement.pdf [file openhrt-2020-001461supp001_data_supplement.pdf]

## SUPPLEMENTARY TABLES

**Supplementary Table 1. Distribution of the number of antihypertensives by CVD risk level (n 99,468)**

|                                   | CVD            | Higher risk  | Lower risk      | Sum    |
|-----------------------------------|----------------|--------------|-----------------|--------|
| 1                                 | 7,078 (36.59%) | 463 (42.01%) | 40,960 (51.83%) | 48,501 |
| 2                                 | 7,878 (40.73%) | 379 (34.39%) | 25,421 (32.17%) | 33,678 |
| >=3                               | 3,740 (19.33%) | 210 (19.06%) | 9,886 (12.51%)  | 13,836 |
| 0 (No antihypertensives reported) | 640 (3.31%)    | 49 (4.45%)   | 2,395 (3.03%)   | 3,084  |
| NA (No medications reported)      | 8 (0.04%)      | 1 (0.09%)    | 360 (0.46%)     | 369    |
| Sum                               | 19,344         | 1,102        | 79,022          | 99,468 |

*Individuals classified as higher risk were those without prior diagnosis of CVD (self-report), and were aged ≥60 years, and were obese (BMI >30), and were current smokers.*

Supplementary Table 2. Concordance between BP measurements at baseline and follow up within three years, using BP threshold of 140/90 mmHg (n 2,134).

|                                   | Measured BP < 140/90 at repeat visit | Measured BP >= 140/90 at repeat visit | Sum   |
|-----------------------------------|--------------------------------------|---------------------------------------|-------|
| Measured BP < 140/90 at baseline  | 892 (79.79%)                         | 226 (20.21%)                          | 1,118 |
| Measured BP >= 140/90 at baseline | 273 (26.87%)                         | 743 (73.13%)                          | 1,016 |
| Sum                               | 1,165                                | 969                                   | 2,134 |

The Cohen's kappa here is 0.5302715 which indicates "moderate agreement".

The Spearman correlation coefficient is 0.5307913.

**Supplementary Table 3. Multivariable logistic regression identifying factors associated with hypertension control stratified by number of comorbidities and prior CVD status, among middle-aged UK adults on anti-hypertensive treatment**

| Coefficient                                              | No comorbidities |              |      |              |        | 2+ comorbidities without CVD |              |      |              |        | 2+ comorbidities with CVD |              |      |              |        |
|----------------------------------------------------------|------------------|--------------|------|--------------|--------|------------------------------|--------------|------|--------------|--------|---------------------------|--------------|------|--------------|--------|
|                                                          | n                | % controlled | OR   | 95% CI       | p      | n                            | % controlled | OR   | 95% CI       | p      | n                         | % controlled | OR   | 95% CI       | p      |
| <b>Age group, years</b>                                  |                  |              |      |              |        |                              |              |      |              |        |                           |              |      |              |        |
| 40-49                                                    | 3750             | 38.0         | 1    |              |        | 775                          | 55.5         | 1    |              |        | 381                       | 64.8         | 1    |              |        |
| 50-59                                                    | 13166            | 35.7         | 0.89 | (0.82, 0.96) | 0.002  | 2586                         | 47.7         | 0.77 | (0.66, 0.91) | 0.002  | 2138                      | 56.9         | 0.73 | (0.58, 0.92) | 0.008  |
| 60-69                                                    | 28052            | 29.1         | 0.66 | (0.61, 0.72) | <0.001 | 4991                         | 39.1         | 0.57 | (0.48, 0.68) | <0.001 | 6728                      | 49.2         | 0.58 | (0.46, 0.73) | <0.001 |
| <b>Gender</b>                                            |                  |              |      |              |        |                              |              |      |              |        |                           |              |      |              |        |
| Female                                                   | 21460            | 35.3         | 1    |              |        | 5032                         | 45.6         | 1    |              |        | 3047                      | 52.3         | 1    |              |        |
| Male                                                     | 23508            | 28.6         | 0.78 | (0.75, 0.82) | <0.001 | 3320                         | 39.7         | 0.85 | (0.77, 0.95) | 0.002  | 6200                      | 51.3         | 1.04 | (0.95, 1.15) | 0.392  |
| <b>Ethnic group</b>                                      |                  |              |      |              |        |                              |              |      |              |        |                           |              |      |              |        |
| White                                                    | 41829            | 31.7         | 1    |              |        | 7728                         | 42.8         | 1    |              |        | 8560                      | 51.4         | 1    |              |        |
| Black                                                    | 1230             | 32.0         | 0.74 | (0.62, 0.87) | <0.001 | 186                          | 45.7         | 1.01 | (0.67, 1.50) | 0.980  | 134                       | 49.3         | 0.75 | (0.48, 1.19) | 0.224  |
| S. Asian                                                 | 767              | 35.7         | 1.00 | (0.82, 1.23) | 0.987  | 177                          | 55.9         | 1.64 | (1.07, 2.52) | 0.025  | 318                       | 55.7         | 1.03 | (0.68, 1.55) | 0.895  |
| Mixed                                                    | 192              | 26.0         | 0.61 | (0.44, 0.86) | 0.004  | 45                           | 53.3         | 1.18 | (0.64, 2.16) | 0.594  | 42                        | 57.1         | 1.13 | (0.60, 2.13) | 0.699  |
| Other                                                    | 735              | 37.0         | 0.99 | (0.82, 1.20) | 0.930  | 159                          | 48.4         | 1.09 | (0.72, 1.65) | 0.681  | 142                       | 55.6         | 0.94 | (0.60, 1.47) | 0.790  |
| <b>Townsend Deprivation Index, quintiles<sup>3</sup></b> |                  |              |      |              |        |                              |              |      |              |        |                           |              |      |              |        |
| Q1: Least deprived                                       | 9985             | 30.7         | 1    |              |        | 1381                         | 41.8         | 1    |              |        | 1372                      | 51.5         | 1    |              |        |
| Q2                                                       | 9546             | 30.8         | 1.01 | (0.95, 1.07) | 0.859  | 1467                         | 40.4         | 0.94 | (0.81, 1.09) | 0.427  | 1540                      | 52.9         | 1.05 | (0.91, 1.22) | 0.480  |
| Q3                                                       | 9243             | 31.0         | 1.02 | (0.95, 1.08) | 0.613  | 1580                         | 41.5         | 0.96 | (0.83, 1.12) | 0.629  | 1620                      | 49.3         | 0.92 | (0.80, 1.07) | 0.275  |
| Q4                                                       | 8729             | 32.8         | 1.09 | (1.03, 1.17) | 0.005  | 1761                         | 44.3         | 1.07 | (0.92, 1.24) | 0.369  | 1947                      | 49.9         | 0.93 | (0.80, 1.07) | 0.304  |
| Q5: Most deprived                                        | 7411             | 34.5         | 1.20 | (1.12, 1.29) | <0.001 | 2154                         | 46.6         | 1.14 | (0.98, 1.33) | 0.081  | 2757                      | 53.6         | 1.05 | (0.91, 1.21) | 0.479  |
| <b>Household Income, GBP</b>                             |                  |              |      |              |        |                              |              |      |              |        |                           |              |      |              |        |
| Greater than 100,000                                     | 1456             | 36.7         | 1    |              |        | 130                          | 50.0         | 1    |              |        | 99                        | 56.6         | 1    |              |        |
| 52,000 to 100,000                                        | 6005             | 34.3         | 0.89 | (0.79, 1.01) | 0.065  | 634                          | 45.9         | 0.80 | (0.55, 1.18) | 0.265  | 523                       | 56.2         | 0.99 | (0.63, 1.53) | 0.950  |
| 31,000 to 51,999                                         | 9323             | 32.0         | 0.83 | (0.74, 0.93) | 0.002  | 1246                         | 45.7         | 0.80 | (0.55, 1.15) | 0.226  | 1142                      | 51.8         | 0.89 | (0.58, 1.36) | 0.584  |
| 18,000 to 30,999                                         | 11054            | 30.8         | 0.81 | (0.72, 0.92) | <0.001 | 1906                         | 41.3         | 0.69 | (0.48, 1.00) | 0.050  | 2047                      | 51.7         | 0.94 | (0.62, 1.43) | 0.767  |
| Less than 18,000                                         | 9753             | 30.4         | 0.79 | (0.69, 0.89) | <0.001 | 2818                         | 43.6         | 0.71 | (0.49, 1.03) | 0.071  | 3659                      | 51.1         | 0.90 | (0.59, 1.36) | 0.605  |
| <b>Occupation category<sup>4</sup></b>                   |                  |              |      |              |        |                              |              |      |              |        |                           |              |      |              |        |
| Professional and Administrative                          | 17182            | 34.6         | 1    |              |        | 2375                         | 45.5         | 1    |              |        | 1912                      | 54.7         | 1    |              |        |
| Skilled trades                                           | 2084             | 27.6         | 0.87 | (0.78, 0.97) | 0.011  | 237                          | 35.9         | 0.85 | (0.64, 1.13) | 0.265  | 326                       | 46.6         | 0.76 | (0.60, 0.97) | 0.028  |
| Services                                                 | 2358             | 34.2         | 0.93 | (0.85, 1.02) | 0.133  | 503                          | 45.1         | 0.96 | (0.78, 1.17) | 0.661  | 316                       | 57.6         | 1.17 | (0.91, 1.50) | 0.212  |
| Manual and Industrial                                    | 3052             | 28.7         | 0.86 | (0.78, 0.94) | <0.001 | 457                          | 46.2         | 1.16 | (0.94, 1.44) | 0.169  | 579                       | 51.1         | 0.91 | (0.75, 1.11) | 0.371  |
| Other employment                                         | 1550             | 34.0         | 1.03 | (0.92, 1.15) | 0.582  | 219                          | 38.4         | 0.82 | (0.61, 1.10) | 0.180  | 185                       | 56.8         | 1.14 | (0.84, 1.56) | 0.397  |
| Retired                                                  | 15838            | 28.9         | 0.91 | (0.87, 0.97) | 0.002  | 3026                         | 39.5         | 1.00 | (0.88, 1.13) | 0.947  | 4077                      | 48.6         | 0.89 | (0.79, 1.01) | 0.066  |
| Unable to work                                           | 796              | 39.3         | 1.24 | (1.06, 1.44) | 0.006  | 1050                         | 49.6         | 1.13 | (0.95, 1.33) | 0.164  | 1495                      | 54.8         | 0.96 | (0.82, 1.11) | 0.595  |



|                                |       |      |      |              |        |      |      |      |              |       |      |      |      |              |       |
|--------------------------------|-------|------|------|--------------|--------|------|------|------|--------------|-------|------|------|------|--------------|-------|
| >=3                            | 5183  | 35.1 | 1.38 | (1.30, 1.48) | <0.001 | 1235 | 41.9 | 0.95 | (0.83, 1.08) | 0.448 | 2055 | 47.6 | 0.92 | (0.82, 1.03) | 0.137 |
| Medication list unavailable    | 1518  | 29.5 | 0.98 | (0.87, 1.10) | 0.731  | 320  | 42.8 | 0.88 | (0.69, 1.11) | 0.278 | 321  | 48.9 | 0.89 | (0.70, 1.12) | 0.312 |
| Family history of CVD          |       |      |      |              |        |      |      |      |              |       |      |      |      |              |       |
| No                             | 16531 | 31.1 | 1    |              |        | 2840 | 44.0 | 1    |              |       | 2383 | 50.6 | 1    |              |       |
| Yes                            | 28437 | 32.2 | 1.03 | (0.99, 1.08) | 0.133  | 5512 | 42.9 | 0.98 | (0.90, 1.08) | 0.743 | 6864 | 52.0 | 1.06 | (0.97, 1.17) | 0.208 |
| Ever screened for bowel cancer |       |      |      |              |        |      |      |      |              |       |      |      |      |              |       |
| Yes                            | 17055 | 31.5 | 1    |              |        | 3436 | 42.6 | 1    |              |       | 4003 | 49.9 | 1    |              |       |
| No                             | 27061 | 32.0 | 0.91 | (0.87, 0.95) | <0.001 | 4708 | 44.0 | 0.93 | (0.84, 1.02) | 0.127 | 4976 | 52.8 | 1.06 | (0.97, 1.15) | 0.210 |

**Note:** <sup>1</sup> Number of individuals in levels of a categorical variable may not add up to total n because 'Do not know' and 'Prefer not to answer' categories have been removed from results table <sup>2</sup> Hypertension control is defined as mean systolic BP  $\geq$  140 mmHg or mean diastolic BP  $\geq$  90 mmHg at baseline assessment, among treated hypertensives. <sup>3</sup> The Townsend index is a measure of material deprivation calculated at the level of census output areas. <sup>4</sup> Occupation categories have been condensed from those recorded in UKB. Professional and Administrative: Managers and Senior Officials, Professional Occupations, Associate Professional and Technical Occupations, Administrative and Secretarial Occupations. Skilled trades: Skilled Trades Occupations. Services: Personal Service Occupations, Sales and Customer Service Occupations. Manual and Industrial: Process, Plant and Machine Operatives, Elementary Occupations. Other employment: free text entry that was not coded by UKB. <sup>5</sup> Self-reported highest education achieved was mapped to the International Standard Classification of Education (ISCED) categories <sup>6</sup> Self-reported country of birth was mapped to the World Bank Analytical Classifications for calendar year 2010. <sup>7</sup> The assessment centre the participant attended was used as a proxy for country of residence <sup>8</sup> BMI has been categorised as: Underweight  $<$  18.5 kg/m<sup>2</sup>; Normal 18.5 - 24.9 kg/m<sup>2</sup>; Overweight 25.0 - 29.9 kg/m<sup>2</sup>; Obese  $\geq$  30.0 kg/m<sup>2</sup>. <sup>9</sup> The total Metabolic Equivalent Task (MET) minutes per week is based on self-reported frequency and duration of walking, moderate and vigorous activity, and was then dichotomized based on WHO physical activity guideline thresholds. <sup>10</sup> The number of comorbidities considered to be of interest - cardiovascular disease, diabetes, arrhythmia (afib/flutter), asthma or COPD, migraines, epilepsy, anxiety, depression, osteoarthritis, other joint disorder.
