# Supplementary material for: Prevalence and determinants of hypertension control among almost 100 000 treated adults in the UK
Source: HighWire-hosted journal article supplement (doi:10.1136/openhrt-2020-001461), 2021-02-01
Supplement: openhrt-2020-001461supp003_data_supplement.pdf [file openhrt-2020-001461supp003_data_supplement.pdf]

Supplementary Figure 2. Scatterplot of blood pressure among treated hypertensives (n 99,468), categorized according to BP threshold 140/90 mmHg.

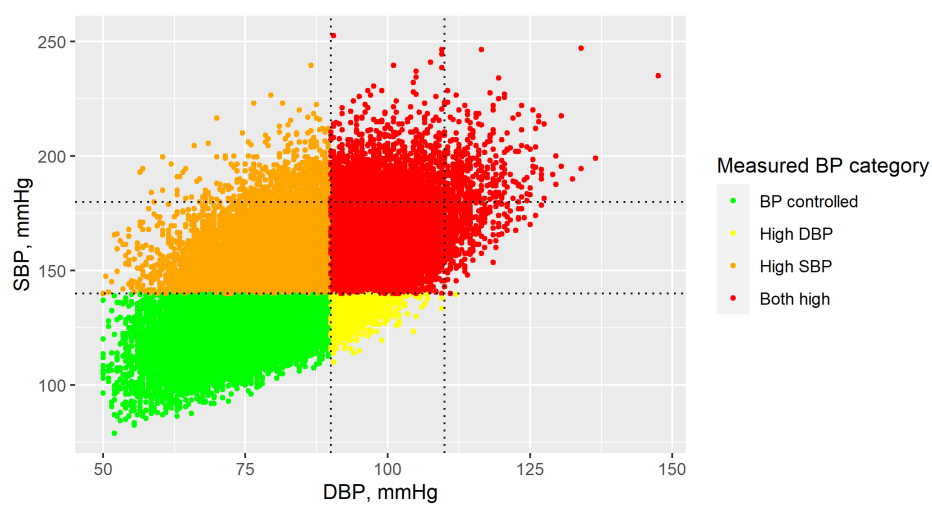

Among diagnosed and treated hypertensives, 399 (0.40%) had both  $SBP \geq 180$  and  $DBP \geq 110$ ; 3754 (3.77%) had  $SBP \geq 180$  or  $DBP \geq 110$ ; 3367 (3.39%) had  $SBP \geq 180$  only; 786 (0.79%) had  $DBP \geq 110$  only.
